# Supplementary material for: Nucleic acids enrichment of fungal pathogens to study host-pathogen interactions
Source: PubMed Central journal article supplement (PMC6889467; doi:10.1038/s41598-019-54608-x), 2019-12-02
Supplement: 41598_2019_54608_MOESM1_ESM.pdf [file 41598_2019_54608_MOESM1_ESM.pdf]

## Supplementary Information

Nucleic acids enrichment of fungal pathogens to study host-pathogen interactions

**Antonio Rodríguez, Brecht Guillemin, Paul Coucke and Mario Vaneechoutte**

Supplementary Table S1. Effect of DNase/RNase treatment, on quantification, expressed as C<sub>q</sub> values<sup>a</sup>, of human nucleic acids (extracted by means of the RiboPure Yeast Kit) of PBMC:*Candida* mixtures, pre-treated with Buffer RLT.

| Cell lysis method | Treatment of NA extract | qPCR         | RT-qPCR      |
|-------------------|-------------------------|--------------|--------------|
| Buffer RLT        | None                    | 36.21 (0.56) | 34.13 (0.21) |
| Buffer RLT        | DNase                   | 36.50 (0.59) |              |
| Buffer RLT        | DNase + RNase           |              | 34.61 (1.01) |

a: C<sub>q</sub> values are means (standard deviations) of six biological replicates, obtained after qPCR and RT-qPCR with CXCL1 primers targeting human DNA and RNA. No statistically significant differences ( $p > 0.05$ ) were observed (paired samples Wilcoxon test).
